# Supplementary material for: Surface modification of mild steel using 4-carboxyphenyl diazonium in sulfuric and hydrochloric acids. A corrosion study
Source: Royal Society of Chemistry journal article supplement (doi:10.1039/d3ra01415k), 2023-01-01
Supplement: d3ra01415k1.pdf [file d3ra01415k1.pdf]

## Supporting Information

**Surface modification of mild steel using 4-carboxyphenyl diazonium in sulfuric and hydrochloric acids. A corrosion study**

**Patrick Marcel Seumo Tchekwagep<sup>1,2,\*</sup>, Goncagül Aksaray<sup>1</sup>, Murat Farsak<sup>3</sup>, Gülfeza Kardaş<sup>1,\*</sup>**

<sup>1</sup> Chemistry Department , Faculty of Arts and Sciences, Çukurova University, 01330 Balcalı, Adana, Türkiye

<sup>2</sup> Analytical Chemistry Laboratory, Faculty of Science, University of Yaoundé 1, 812 Yaoundé, Cameroon.

<sup>3</sup> Department of Battery Systems and Hydrogen Technologies, Osmaniye Korkut Ata University, Institute of Natural and Applied Science, Türkiye

Corresponding authors\*

Email addresses: 3omues@gmail.com, gulfeza@cu.edu.tr

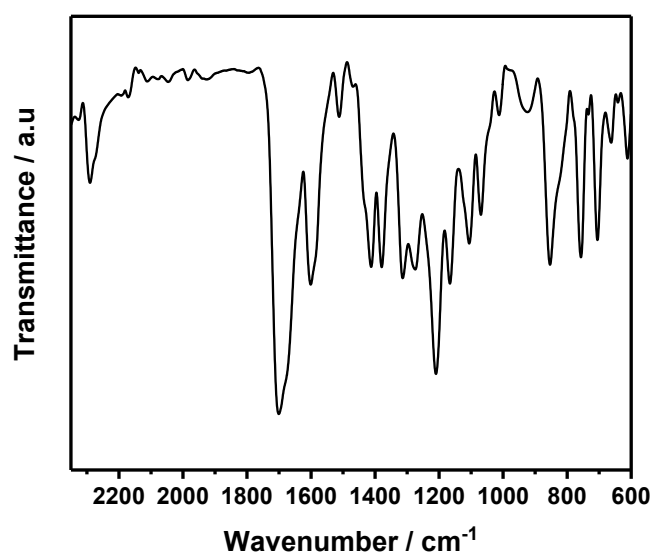

**Fig. 1S** Infrared spectra of the solid obtained by drying the aqueous solution of 4-aminobenzoic acid and sodium nitrite in 0.5 M HCl, which resulted in the *in-situ* formation of the diazonium product.

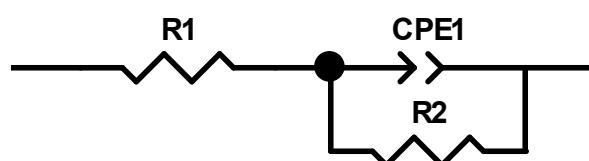

**Fig. 2S** The Randle's CPE equivalent circuit used to fit the impedance data. R1 is the solution resistance, CPE1 is the constant phase element and R2 is the polarization resistance.

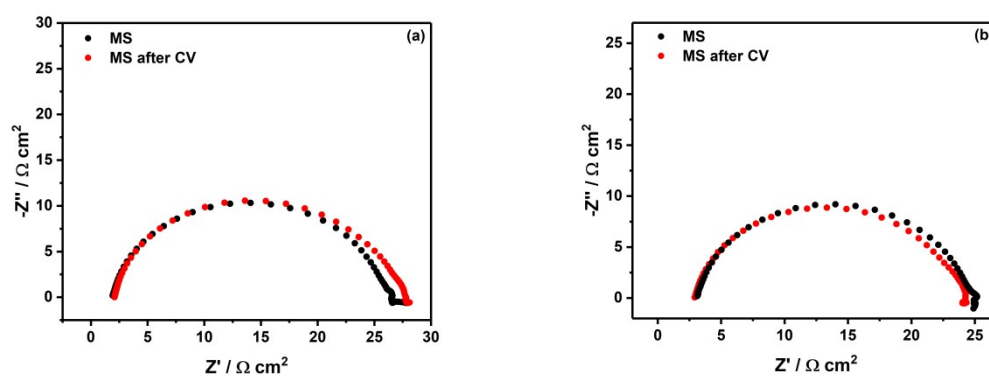

**Fig. 3S** Nyquist plots of MS surface without and with electrochemical assistance in (a) 0.5 M HCl and (b) 0.25 M H<sub>2</sub>SO<sub>4</sub>.
